# Supplementary material for: Patient-specific effects of soluble factors from Staphylococcus aureus and Staphylococcus epidermidis biofilms on osteogenic differentiation of primary human osteoblasts
Source: PubMed Central journal article supplement (PMC8390505; doi:10.1038/s41598-021-96719-4), 2021-08-26
Supplement: 41598_2021_96719_MOESM1_ESM.pdf [file 41598_2021_96719_MOESM1_ESM.pdf]

## Supplementary Information:

### Patient-specific effects of soluble factors from *Staphylococcus aureus* and *Staphylococcus epidermidis* biofilms on osteogenic differentiation of primary human osteoblasts

Jutta Tübel<sup>1\*</sup>, Elisabeth Maier<sup>1</sup>, Magdalena Jegen<sup>1</sup>, Carmen Marthen<sup>1</sup>,  
Andreas Obermeier<sup>1</sup>, Alexander T. Haug<sup>1</sup>, Jochen Schneider<sup>2</sup>, Rainer  
Burgkart<sup>1</sup>

Figure S1:

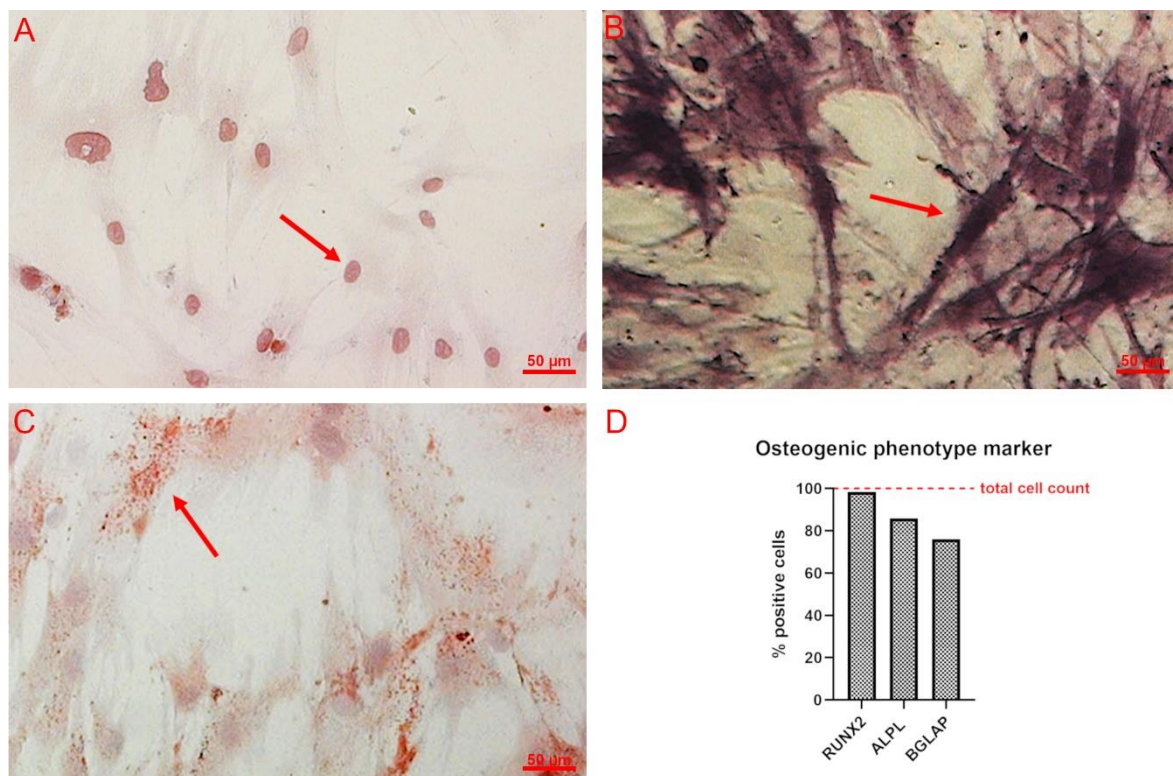

**Fig. S1** The osteogenic phenotype of the primary osteoblasts used were confirmed by the positive stain of RUNX2 (A), alkaline phosphatase (B) and osteocalcin (C) and the semi quantitative evaluation is summarized in D.

Figure S2:

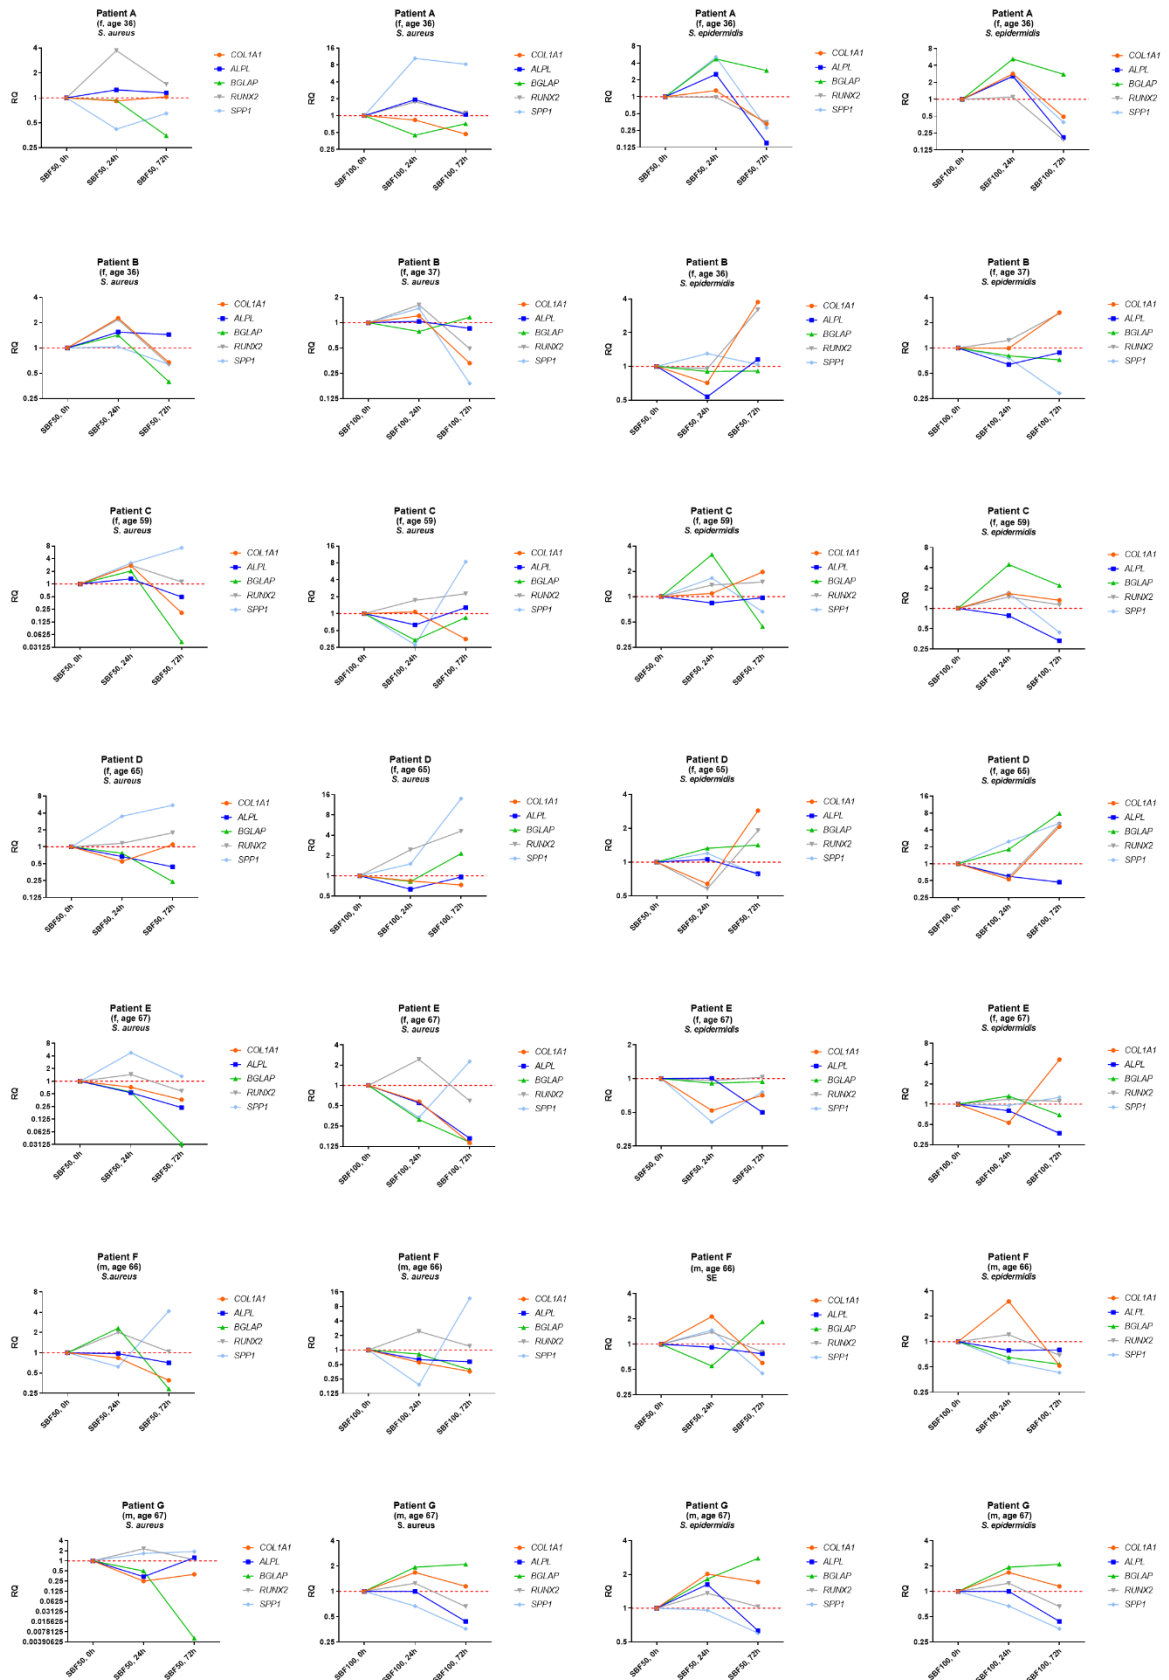

**Fig. S2** Gene expression results of *COL1A1*, *ALPL*, *BGLAP*, *RUNX2* and *SPP1*, shown for individual donors.

**Table S1** Donor characteristics

| <b>Patient</b> | <b>Age</b> | <b>Gender</b> |
|----------------|------------|---------------|
| <b>A</b>       | 36         | female        |
| <b>B</b>       | 37         | female        |
| <b>C</b>       | 59         | female        |
| <b>D</b>       | 65         | female        |
| <b>E</b>       | 67         | female        |
| <b>F</b>       | 66         | male          |
| <b>G</b>       | 67         | male          |

**Table S2** Primer ID

| <b>Gene Symbol</b>   | <b>Gene Name</b>                         | <b>TaqMan Assay ID</b> |
|----------------------|------------------------------------------|------------------------|
| <b><i>ALPL</i></b>   | alkaline phosphatase, liver/bone/kidney  | Hs01029144_m1          |
| <b><i>BGLAP</i></b>  | bone gamma-carboxyglutamate protein      | Hs01587814_g1          |
| <b><i>COL1A1</i></b> | collagen type I alpha 2 chain            | Hs01028970_m1          |
| <b><i>RUNX2</i></b>  | RUNX family transcription factor 2       | Hs01047973_m1          |
| <b><i>SPP1</i></b>   | secreted phosphoprotein 1                | Hs00959010_m1          |
| <b><i>GAPDH</i></b>  | glyceraldehyde-3-phosphate dehydrogenase | Hs99999905_m1          |
